# Supplementary material
Source: PubMed Central journal article supplement (PMC9783438)
Supplement: 13063_2022_6643_MOESM3_ESM.pdf [file 13063_2022_6643_MOESM3_ESM.pdf]

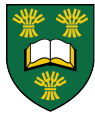

## *Certificate of Approval*

---

Application ID: 1701

Principal Investigator: Bonnie Fournier  
Geoffrey Maina

Locations Where Research  
Activities are Conducted: Uganda

Student(s):

Funder(s): Canadian Institutes of Health Research

Sponsor: Canadian Institutes of Health Research

Title: Reducing HIV-related Stigma in School Children in Northern Uganda: A Multi-level  
Arts-based Population Health Intervention

Approved On: 18-Dec-2020

Expiry Date: 18-Dec-2021

Approval Of: TRU Human Ethics Research Application

Information Letter for Verbal Consent - Baseline Interviews for Students

Information Letter for Verbal Consent - Arts-based Intervention with  
Youth 10-18 Years (Group 1, 2, and 3)

Information Letter for Verbal Consent - Arts-based Intervention for  
Teachers and Elders

Risk Management Plan during the COVID-19 Pandemic

Authorization to Release Confidential HIV Related Information:  
Parent/Guardian and Student

Baseline Questionnaire and Interview Questions

Acknowledgment Of:

Review Type: Full Board

Meeting Date: 12-Feb-2020

**CERTIFICATION**

The University of Saskatchewan Behavioural Research Ethics Board (Beh-REB) is constituted and operates in accordance with the current version of the Tri-Council Policy Statement: Ethical Conduct for Research Involving Humans (TPCS 2 2018). The University of Saskatchewan Behavioural Research Ethics Board has reviewed the above-named project. The proposal was found to be acceptable on ethical grounds. The principal investigator has the responsibility for any other administrative or regulatory approvals that may pertain to this project, and for ensuring that the authorized project is carried out according to the conditions outlined in the original protocol submitted for ethics review. This Certificate of Approval is valid for the above time period provided there is no change in experimental protocol or consent process or documents.

Any significant changes to your proposed method, or your consent and recruitment procedures should be reported to the Chair for Research Ethics Board consideration in advance of its implementation.

**ONGOING REVIEW REQUIREMENTS**

In order to receive annual renewal, a status report must be submitted to the REB Chair for Board consideration within one month prior to the current expiry date each year the project remains open, and upon project completion. Please refer to the following website for further instructions: <https://vpresearch.usask.ca/researchers/forms.php>.

---

---

***Digitally Approved by Diane Martz  
Chair, Behavioural Research Ethics Board  
University of Saskatchewan***
