# Supplementary material
Source: PubMed Central journal article supplement (PMC9783438)
Supplement: 13063_2022_6643_MOESM4_ESM.pdf [file 13063_2022_6643_MOESM4_ESM.pdf]

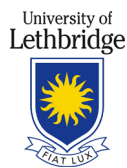

Office of Research Ethics  
4401 University Drive  
Lethbridge, Alberta, Canada  
T1K 3M4  
Phone: (403) 329-2747  
Email: [research.services@uleth.ca](mailto:research.services@uleth.ca)  
FWA 00018802 IORG 0006429

Tuesday, 16 February 2021

PI: Jean Harrowing, Faculty of Health Sciences

Study Title: Reducing HIV-related Stigma in School Children in Northern Uganda: A Multi-level Arts-based Population Health Intervention

Action: Approved  
HPRC Protocol Number: 2020-004

Approval Date: February 16, 2021

Term Date: January 20, 2022

Dear Jean,

Thank you for submitting the renewal report for the study titled “Reducing HIV-related Stigma in School Children in Northern Uganda: A Multi-level Arts-based Population Health Intervention”; it has been reviewed and approved on behalf of the University of Lethbridge Human Participant Research Committee (HPRC) for the **approval period ending January 20, 2022**. The HPRC conducts its reviews in accord with University policy and the Tri-Council Policy Statement: Ethical Conduct for Research Involving Humans (2018).

Please note that an annual renewal report for continuing ethics certification will be due to the Office of Research Ethics on or before **January 20, 2022**.

We look forward to the resumption of this research when conditions allow.

Sincerely,

Susan Entz, M.Sc., Ethics Officer  
Office of Research Ethics  
University of Lethbridge  
4401 University Drive  
Lethbridge, Alberta, Canada  
T1K 3M4
