# Supplementary material
Source: PubMed Central journal article supplement (PMC9783438)
Supplement: 13063_2022_6643_MOESM6_ESM.pdf [file 13063_2022_6643_MOESM6_ESM.pdf]

## Approval Notification for Initial Review Application: Protocol # TASOREC/011/2020-UG-REC-009

---

**Sent:** Monday, April 20, 2020 2:53 AM

**Subject:** Approval Notification for Initial Review Application: Protocol # TASOREC/011/2020-UG-REC-009

Dear Prof. Bonnie Fournier,

TASO IRB/REC reviewed your correspondence with revisions to the non-academic research protocol,

Protocol REC Application Title: **Reducing HIV-Related Stigma in School Children in Northern Uganda: A Multi-level Arts-Based Population Health Intervention**

In the matter concerning the review, we are pleased to confirm a favorable ethical decision for the above research project.

Effective **17/04/2020** the REC approved the initial application request for the research.

Protocol expiration date: **16/04/2021**

Annual review due date: **15/02/2021**

### **To Note**

Submit two final clean versions (hard copies) of the revised protocol bearing the date and version number, data collection instrument (s), and consent/assent forms with translations (where applicable) for approval with a TASO REC Stamp.

You will also be availed with the ethics approval letter upon submission of the foregoing.

The approval provides permission to begin the research activities outlined in the REC-approved protocol and supporting documents.

All research activities must be conducted in accordance with only approved (stamped) protocols.

We wish you success in the conduct of your study.

Please contact TASO REC if you have any questions or need additional information.

Sincerely,

Mijumbi Andrew Ojok,  
TASO IRB/REC Administrator  
+256 785037496; 752774281

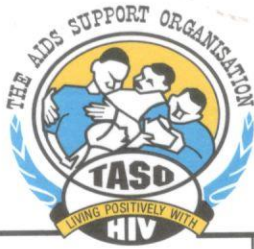

# The AIDS Support Organisation (TASO) Uganda Ltd.

TASO Headquarters  
Mulago Hospital Complex  
P.O. Box 10443, Kampala-Uganda  
Tel: +256 414 532 580/1  
Fax: +256 414 541 288  
Email: [mail@tasouganda.org](mailto:mail@tasouganda.org)  
Website: [www.tasouganda.org](http://www.tasouganda.org)

16<sup>th</sup> April, 2021

#### TASO COLLEGE OF HEALTH SCIENCES (TACHS)

Kanyanya Off Gayaza-Road,  
Alter Mpererwe  
P.O. Box 10443, Kampala  
Tel: +256 414 567 637  
Fax: +256 414 566 704  
Email: [training@tasouganda.org](mailto:training@tasouganda.org)

#### SERVICE CENTRES

**TASO ENTEBBE**  
Plot 15-17 Lugard Avenue  
P.O. Box 235, Entebbe  
Tel: 0414 320 030/0752 774 135  
Email: [entebbe@tasouganda.org](mailto:entebbe@tasouganda.org)

**TASO GULU**  
Plot 4 Mathew Lukwiya Road  
P.O. Box 347, Gulu  
Tel: 0471 432743/ 0752 774142  
Email: [gulu@tasouganda.org](mailto:gulu@tasouganda.org)

**TASO JINJA**  
Jinja Referral Hospital  
P.O. Box 577, Jinja  
Tel: 0393260 117/0752 774 145  
Fax: 0434 120382  
Email: [jinja@tasouganda.org](mailto:jinja@tasouganda.org)

**TASO MASAKA**  
Masaka Hospital  
P.O. Box 1679, Masaka  
Tel: 0392 749 998/0752 774 145  
Email: [masaka@tasouganda.org](mailto:masaka@tasouganda.org)

**TASO MASINDI**  
Masindi Hospital  
P.O. Box 117, Masindi  
Tel: 0465 420 636/ 0752 774 144  
Fax: 0465 420 636  
Email: [masindi@tasouganda.org](mailto:masindi@tasouganda.org)

**TASO MBALE**  
Mbale Hospital  
P.O. Box 2250, Mbale  
Tel: 0454 433 507/ 0752 774 137  
Fax: 0454 435 851  
Email: [entebbe@tasouganda.org](mailto:entebbe@tasouganda.org)

**TASO MBARARA**  
Plot 25 and 27 Hospital Road  
P.O. Box 1010, Mbarara  
Tel: 0485 421 323/ 0752 774 136  
Fax: 0485 421 323  
Email: [mbarara@tasouganda.org](mailto:mbarara@tasouganda.org)

**TASO MULAGO**  
Mulago Hospital  
P.O. Box 11485, Kampala  
Tel: 0414 530 034/ 0752 774 139  
Fax: 0414 541 288  
Email: [mulago@tasouganda.org](mailto:mulago@tasouganda.org)

**TASO RUKUNGIRI**  
Ishasha Road  
P.O. Box 350, Rukungiri  
Tel: 0486 442 610/ 0752 774 141  
Fax: 0486 442 613  
Email: [rukungiri@tasouganda.org](mailto:rukungiri@tasouganda.org)

**TASO SOROTI**  
Soroti Hospital  
P.O. Box 422, Soroti  
Tel: 0454 461 380/0752 774 143  
Fax: 0454 461 042  
Email: [soroti@tasouganda.org](mailto:soroti@tasouganda.org)

**TASO TORORO**  
Plot 30, Cox Road  
P.O. Box 777, Tororo  
Tel: 0454 442 009/0752 774 140  
Fax: 0454 445 334  
Email: [tororo@tasouganda.org](mailto:tororo@tasouganda.org)

**DISCRETE PROJECTS**  
GRANTS MANAGEMENT UNIT /  
GLOBAL FUND  
House of Hope, Plot 10  
Windor Loop  
P.O. Box 10443, Kampala  
Tel: 0414 259 555/ 0752 774 109  
Email: [mail@tasouganda.org](mailto:mail@tasouganda.org)

**TASO-KARAMOJA PROJECT**  
Plot 10, Independence Avenue  
P.O. Box 131, Moroto  
Tel: 0752 744 792  
Fax: 0454 445 334  
Email: [mail@tasouganda.org](mailto:mail@tasouganda.org)

**TORORO LABORATORY HUB**  
P.O. Box 777, Tororo  
Tel: 0454 442 009/ 0752 774 723  
Fax: 0454 445 334

Our Ref: TASOREC/011/2020-UG-REC-009 (RNWL)

**Dr. Bonnie Fournier,**  
Principal Investigator  
[bofournier@tru.ca](mailto:bofournier@tru.ca)

Dear Dr. Bonnie,

**RE: ANNUAL RENEWAL OF RESEARCH PROTOCOL "REDUCING HIV-RELATED STIGMA IN SCHOOL CHILDREN IN NORTHERN UGANDA: A MULTI-LEVEL ARTS-BASED POPULATION HEALTH INTERVENTION."**

Thank you for submitting the progress report and an application for annual renewal for the protocol titled "Reducing HIV-Related Stigma in School Children in Northern Uganda: A Multi-level Arts-Based Population Health Intervention" Version 2 dated, **23<sup>rd</sup> March 2021.**

In the matter concerning the continuing review of the application and progress report, the committee has renewed the study for one year.

This approval is valid until **15<sup>th</sup> April 2022**, after which you will be required to make a request for extension to the Chairperson TASO REC in case of continuation with the study.

Study Reports: It is a requirement by the REC that you submit timely progress reports.

Proceed with the registration of the continuing review approval by the Uganda National Council of Science and Technology (UNCST) before commencement.

Yours sincerely,

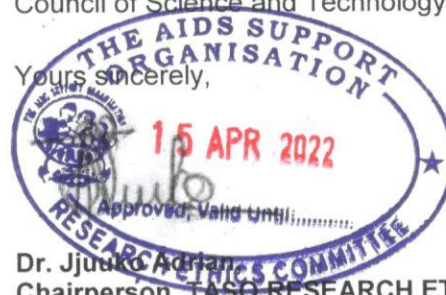

**Dr. Jjuuko**  
Chairperson, TASO RESEARCH ETHICS COMMITTEE (REC)

CC: Executive Director, TASO (U) Limited

CC: Uganda National Council for Science & Technology (UNCST)
