# Supplementary material
Source: PubMed Central journal article supplement (PMC9783438)
Supplement: 13063_2022_6643_MOESM8_ESM.pdf [file 13063_2022_6643_MOESM8_ESM.pdf]

**AUTHORIZATION FOR FUNDING**

CIHR (Canadian Institutes of Health Research) has approved funding as detailed below. Subject to the approbation of funding by Parliament, these funds will be made available to the business officer at the indicated institution for disbursement.

**AUTORISATION DE FINANCEMENT**

IRSC (Instituts de recherche en santé du Canada) vous accorde les fonds tel qu'indiqué ci-dessous. Suivant l'affectation des crédits par le Parlement du Canada, les fonds seront mis à la disposition du trésorier de l'établissement indiqué qui s'occupera des versements.

201809PJT-409282-PH1-ADZX-222914

04/02/2019

**Institution Paid/Établissement chargé d'administrer les fonds:**  
Thompson Rivers University (Kamloops, BC)

**Recipient(s)/Bénéficiaire(s):** Fournier, Bonnie  
School of Nursing  
Thompson Rivers University (Kamloops, BC)  
  
Dr. Joshua Mendelsohn, Mr. Santo Ojok, Dr. Geoffrey Muriithi Maina, Dr. Olenka Bilash

**Program/Programme:** Project Grant  
Grant New

**Primary Institute/Institut principal:** Population and Public Health

**Project Title/Titre du projet:**  
Reducing HIV-related Stigma in School Children in Northern Uganda: A Multi-level Arts-based Population Health Intervention

**Co-investigator(s) & Associates/Supervisor(s)/Host/Co-chercheur(s)/Directeur(s) de recherche/Hôte:**  
Ms. Gillian Strudwick, Dr. Candace Nykiforuk, Dr. Kathryn Irene Banks, Dr. Jean N Harrowing, et al.

| PAYMENT DETAILS/DÉTAILS DES VERSEMENTS |           | Funding Reference Number/<br>No. de Référence du financement: | PJT — 162310                               |         |
|----------------------------------------|-----------|---------------------------------------------------------------|--------------------------------------------|---------|
| Period<br>Période                      | Type      | Amount by Type<br>Montant par type                            | Total by Fiscal Year<br>Total par exercice |         |
| 01/04/2019 to 31/03/2020               | Operating | \$139,499                                                     | \$139,499                                  | 2019-20 |
| 01/04/2020 to 31/03/2021               | Operating | \$139,499                                                     | \$139,499                                  | 2020-21 |
| 01/04/2021 to 31/03/2022               | Operating | \$139,499                                                     | \$139,499                                  | 2021-22 |
| 01/04/2022 to 31/03/2023               | Operating | \$139,499                                                     | \$139,499                                  | 2022-23 |
| 01/04/2023 to 30/06/2023               | Operating | \$34,878                                                      | \$34,878                                   | 2023-24 |

|                                                                                         |                                                                                                            |
|-----------------------------------------------------------------------------------------|------------------------------------------------------------------------------------------------------------|
| Progress Report Required:<br>Rapport des progrès réalisés requis: <b>Not Applicable</b> | Application to Renew Funding Required:<br>Demande de renouvellement des fonds requis: <b>Non-Renewable</b> |
|-----------------------------------------------------------------------------------------|------------------------------------------------------------------------------------------------------------|

**NOTES:**

CIHR will require you to submit an electronic Final Report through the Research Reporting System on ResearchNet for this grant. Instructions will be provided through an email notification from the ResearchNet system once the activity becomes available.

CIHR requires that its contribution to your research be acknowledged in all written and oral presentations of your research results, including scientific articles, news releases, news conferences, public lectures and media interviews. For all scientific articles, the CIHR acknowledgement must include your Funding Reference Number (FRN) indicated above in the "Payment Details" section. Please see CIHR's Guidelines on Public Communication which are enclosed for more information on public communication and acknowledging requirements.

You received this funding because your colleagues volunteered their time to assist CIHR with the review of your application. We ask that, as a recipient of CIHR funding, you will participate in CIHR peer review activities if invited.

By drawing on the funds provided through this grant/award you agree to the terms and conditions set out in the attached "Conditions of Funding", any breach of which may result in CIHR taking remedial action as described therein.

If you are in receipt or become eligible to receive any funding from another source for any part of this project, you must advise CIHR immediately by following the instructions outlined in the "Funding Overlap Declaration" form <http://www.cihr-irsc.gc.ca/e/797.html>. Failure to self-declare overlap could lead to CIHR cancelling all funding related to this grant.

*Renée Venne*

Renée Venne  
Acting Manager, Contact Centre  
Operations Support

- cc  Supervisor/Directeur
- Dean/Doyen
- Host/Hôte
- Administration
- Accountant/Comptable
- CIHR Finance/Service des Finance d'IRSC
- Other/Autre
